## Autophagy as an emerging therapy target for ovarian carcinoma

Lei Zhan<sup>1</sup>, Yu Zhang<sup>1</sup>, Wenyan Wang<sup>1</sup>, Enxue Song<sup>1</sup>, Yijun Fan<sup>1</sup>, Jun Li<sup>2,\*</sup>, Bing Wei<sup>1</sup>

<sup>1</sup>Department of gynecology and obstetrics, The Second Affiliated Hospital of Anhui Medical University, Hefei 230601, China

<sup>2</sup>School of Pharmacy, Anhui Key Laboratory of Bioactivity of Natural Products, Anhui Medical University, Hefei 230032, China

\* Co-corresponding author

**Correspondence to:** Bing Wei, **email:** m1351565@163.com, weibing1965@163.com

**Keywords:** autophagy, dual functions, ovarian carcinoma, mechanism, therapies

**Received:** June 21, 2016

**Accepted:** September 21, 2016

**Published:** November 04, 2016

### ABSTRACT

**Autophagy is a conserved cellular self-digestion pathway for maintenance of homeostasis under basal and stressed conditions. Autophagy plays pivotal roles in the pathogenesis of many diseases, such as aging-related diseases, autoimmune diseases, cardiovascular diseases, and cancers. Of special note is that accumulating data suggest an intimate relationship between autophagy and ovarian carcinoma. Autophagy is well identified to act as either as a tumor-suppressor or as a tumor-promoter in ovarian carcinoma. The exact function of autophagy in ovarian carcinoma is highly dependent on the circumstances of cancer including hypoxic, nutrient-deficient, chemotherapy and so on. However, the mechanism underlying autophagy associated with ovarian carcinoma remains elusive, the precise role of autophagy in ovarian carcinoma also remains undetermined. In this review, we tried to sum up and discuss recent research achievements of autophagy in ovarian cancer. Moreover, waves of novel therapies ways for ovarian carcinoma based on the functions of autophagy were collected.**

### INTRODUCTION

Ovarian carcinoma is the fifth leading cause of death from all gynecological malignancies in development countries. Despite the improvement of surgical techniques and the advent of more effective therapeutics, the overall 5-year survival rate of ovarian cancer is approximately 30-40% [1, 2]. Therefore, it is necessary to explore novel avenues to protect against ovarian cancer [3-5]. In the past few decades, a growing body of researches have been illustrated an intimate correlation between autophagy and ovarian carcinoma which may provide new treatment option for ovarian carcinoma [6].

Autophagy is an evolutionarily conserved cellular self-digestion pathway for maintenance of homeostasis by recycling lysosome-dependent intracellular soluble macromolecules, organelles and microorganisms [7, 8]. It is well known that there are three different forms of autophagy which are macroautophagy, chaperone-mediated autophagy and microautophagy respectively [9]. Macroautophagy refers to simply as autophagy and this review focuses on macroautophagy [9]. Autophagy exists at basal level in all cell types and could be dramatically activated by a wide diversity of stresses, such as starvation, infection, hormones, oncogenes, oxidative stress and endoplasmic reticulum

(ER) stress [10, 11]. Furthermore, the stresses-activated autophagy is correlated with many key signal transduction pathways, including phosphatidylinositol-3-kinase (PI3K), myostatin, proteasome, autophagy-lysosome pathways and so on [12]. The principal autophagic signaling that have been implicated in autophagy progression are the PI3K/AKT/mammalian target of rapamycin (mTOR) pathway and liver kinase B1 (LKB1)/adenosine monophosphate-activated protein kinase (AMPK) pathway. PI3K/AKT/mTOR activation inhibits autophagy progression, whereas LKB1/AMPK activation contributes to autophagy progression [13]. The multistep processes of autophagy is controlled by the autophagy-related ATG groups and occurs in four steps as follows [13, 14]: (i) Initiation stage, the activation of ULK1 complex (ULK1, ULK2, ATG13, FIP200, and ATG101) translocates to the ER and transiently associates with VMP1 and Beclin1 in the initiation stage, further facilitating the activation of the ER-localized autophagy-specific class III phosphatidylinositol-3-OH kinase (PI3K)-Beclin1-VPS34 complex. PI3K-Beclin1-VPS34 complex then recruits to the mitochondria, ER and golgi apparatus to form an isolated membrane phagophore through recycling endosome or plasma membrane. (ii) Elongation and completion stage, in this stage, cargo recognition and elongation of phagophore contribute to the

formation of double-membrane structure, autophagosome. It is noted that the formation of double-membrane structure autophagosomes is the landmark event in autophagy and which requires two ubiquitin-like protein conjugation systems: the first is the ATG7 and ATG10 enzymes produced ATG12-ATG5-ATG16 conjugation system. The other conjugate system is the phosphatidylethanolamine (PE)-LC3. LC3, which consists two forms the cytoplasmic form LC3-I and the processed form LC3-II, is synthesized as an inactive form called pro-LC3. This form must be cleaved by a protease of the ATG4 family of cysteine proteinases to render it capable of undergoing a series of reactions first with ATG7 and then with ATG3, which finally end in the covalent binding of LC3 to a molecule of PE. Once autophagosome has ended its life cycle, the remaining LC3 molecules attached to the outer leaflet of the autolysosomal membrane are cleaved again by a protease of the ATG4 family of cysteine proteinases to allow its re-use by the autophagic cellular machinery. (iii) Maturation stage, the cargo sequestration is completed and the outer membrane of the autophagosome fuses with the lysosome to become an autolysosome, which leading to the degradation of autophagosomal contents by lysosomal enzymes. (iv) Fusion or degradation stage, the cargo is broken down and released into the cytosol in this stage (Figure 1).

Autophagy earns wide attentions owing to its intimate correlation in a multitude of diseases and its potential as a target in diseases therapy [15, 16]. It is worth mentioning in advance that autophagy play either cytotoxic function or cytoprotective function depending on the condition of diseases. In general, decreased levels of autophagy contribute to cell proliferation. Whereas increased levels of autophagy can also promote cell survival in the context

of hypoxic, nutrient-deficient [17]. On the basis of that autophagy was revealed to act either as a tumor-suppressor or as a tumor-promoter. For example, decreased levels of autophagy promoted cancer cell proliferation in the early stages of tumorigenesis, stimulating autophagy could be beneficial for cancer prevention [18, 19]. Alternatively, autophagy induction promoted cancer cell survival in response to hypoxic and nutrient-deficient tumor microenvironments, deletion of autophagy genes resulted in tumor cell death in hypoxic [20, 21].

Noteworthy, rapidly accumulating attention is being paid to the role of autophagy in ovarian carcinoma and its potential as a promising therapeutic target [22, 23]. The aim of this review is to sum up the collective knowledge of autophagy in ovarian cancer and discuss the therapies target for ovarian cancer based on the functions of autophagy.

## AUTOPHAGY AND OVARIAN CARCINOMA

### Autophagy-related proteins and ovarian carcinoma

During autophagy induction, LC3-I transforms to LC3-II and forms autophagosome in the outer and inner membrane, implying that LC3-II expression represents autophagy level [24]. It was indicated that LC3 was expressed at a lower level in ovarian cancer tissues as compared to benign and borderline ovarian tumors. Furthermore, the expression of LC3 was lower in FIGO stages III and IV than in stages I and II [25]. A diversity of studies implied that promoting autophagy-related cell death was required for up-regulation of LC3-II levels in ovarian cancer tissues and cells [26–28].

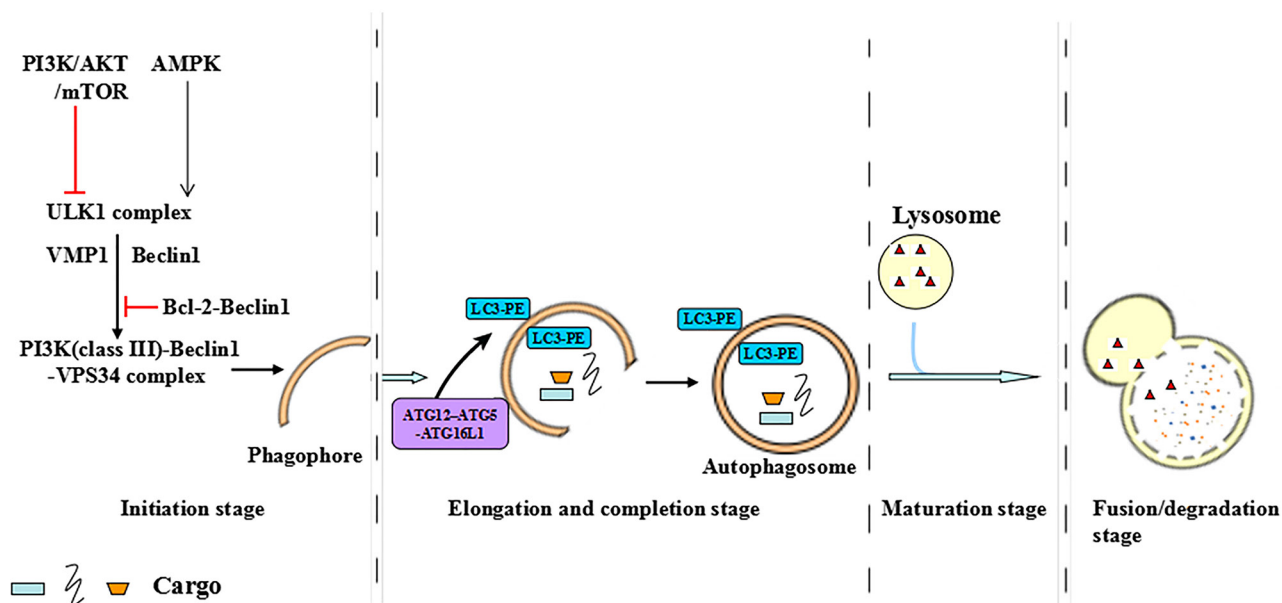

**Figure 1: The multistep processes of autophagy.** The multistep process of autophagy is controlled by the autophagy-related ATG groups and occurs in four steps: initiation stage, elongation and completion stage, maturation stage and fusion or degradation stage.

Autophagy process was involved in down-regulation of autophagy-related protein p62 [29]. p62 binds to ubiquitinated protein aggregates and transports them to the autophagosomes in the late stage of autophagy [30]. For example, it was indicated that p62 binds directly to LC3 to facilitate degradation of ubiquitinated protein aggregates [31]. High expression of cytoplasmic p62 was found in ovarian cancer tissues and cells [28, 29]. Furthermore, high expression of cytoplasmic p62 in ovarian cancer was positively correlated with serous carcinoma, advanced stage, presence of residual tumor and low overall survival rate, which strongly suggests that high expression of cytoplasmic p62 was a prognostic biomarker in ovarian cancer [32]. Down-regulation of p62 contributed to autophagic- and caspase-mediated cell death in a p53-independent manner in chemoresistant ovarian cancer cell lines [33].

As stated above, Beclin1 was involved in autophagosome formation through assembling PI3K-Beclin1-VPS34 complex, Bcl-2 inhibited autophagy through binding to Beclin1. It was interesting to detect that 40-75% of sporadic ovarian cancers exhibited a monoallelic deletion of the gene that encodes Beclin1 [34]. The expression of Beclin1 was dramatically higher in the samples of benign and borderline ovarian tumors than those in malignant epithelial ovarian cancers, higher levels of Beclin1 were negatively associated with advanced FIGO stage and histological grade [25]. Notably, patients with high Beclin1 levels exhibited better survival than those with low Beclin1 levels [35]. Inhibition of autophagy contributed to ovarian carcinoma development was required for suppression of Beclin1 and up-regulation of Bcl-2 [36]. Consistently, in ovarian carcinoma cohort, decreased expression of Beclin1 was inversely correlated with Bcl-xL, which was an antiapoptotic protein from the Bcl-2 family. Low Beclin1/high Bcl-xL ovarian carcinoma group exhibited the lowest survival rate [37]. It was worth noting that the tumor suppressive effects of Beclin1 were witnessed to be dispensable for autophagy induction because efficient siRNA-mediated Beclin1 knockdown did not attenuate autophagy induction in ovarian tumor cells [38, 39].

ATG groups were also expressed at a lower level in ovarian cancer tissues and cells. ATG5-ATG12 conjugates were essential to LC3-I to LC3-II conversion. Studies convincingly showed that the expressions of ATG7-activated ATG5-ATG12 conjugates were consistent with LC3-II and Beclin1 in ovarian cancer [36, 39, 40]. Unlike Beclin1, efficient ATG5 and ATG7 knockdown could block autophagy induction in ovarian cancer cell lines, as evidenced by suppression of LC3-II [39].

Based on these above findings, it is reasonable to assume that down-regulation of autophagy appears to be prominent in the development of ovarian cancer. Inconsistently, the study of Dai and colleagues described an up-regulation of ATG9A expression in ovarian carcinomas. Furthermore, the percentage of positive ATG9A expression was significantly higher in cases with clinical stage III and

IV ovarian cancer than in cases with clinical stage II ovarian cancer, elevated ATG9A was an independent poor prognostic predictor and negatively related with overall survival and progression-free survival in ovarian cancer [41].

### **Autophagy-related signaling pathways in ovarian carcinoma**

The induction of autophagy was intimately involved in apoptosis promotion and proliferation inhibition in ovarian carcinoma. Therefore, the signaling pathways which have essential roles in proliferation or apoptosis were correlated with ovarian carcinoma development by regulating autophagy. For example, it was demonstrated that inhibition of the PI3K/Akt/mTOR and Ras/MAP signaling pathways could restrict ovarian cancer development by activating autophagy [3, 42]. Zi et al. also detected that danusertib induced cell apoptosis and autophagy in ovarian carcinoma was involved in PI3K/Akt/mTOR signaling pathway inhibition [43]. Furthermore, Bahrami and colleagues indicated that monepantel induced autophagy in human ovarian cancer cells through disruption of the mTOR/p70S6K signaling pathway [44]. In contrast, activation of p38 MAPK and JNK signaling pathways contributed to the induction of autophagy in ovarian cancer cells [45-47]. For instance, Neferine induced autophagy of human ovarian cancer cells *via* p38 MAPK/JNK activation [47]. Inhibition of JNK3 could promote apoptosis and autophagy in chemoresistant human ovarian cancer cells [45].

### **Chemotherapy resistance with autophagy in ovarian carcinoma**

Cisplatin is a first-line therapeutic agent used in therapy of ovarian carcinoma. However, cisplatin resistance always exists in ovarian cancer patients and resulted in treatment failure [48]. It was suggested that autophagy had a protective mechanism in the regulation of chemosensitivity to cisplatin with virtually promotion of autophagy contributed to cisplatin resistance in human ovarian cancer, inhibition of autophagy through using autophagy inhibitor and Beclin1 small interfering RNA (siRNA) increased cisplatin-induced cell death and apoptosis [49, 50]. Consistently, Bao and colleagues found NF-E2-related factor 2 (Nrf2) contributed to cisplatin resistance through activating autophagy in ovarian carcinoma [48]. Furthermore, methionine synthase reductase (MTRR), which was a promoter of carcinogenesis, was found to be increased in ovarian carcinoma. Inhibiting MTRR expression suppressed cisplatin resistance by reducing autophagy [51]. A recent study by Xiao et al. also suggested that the oncoprotein, YAP, induced cisplatin resistance through activating autophagy in human ovarian carcinoma cells [52]. These results indicated that autophagy acted as a protector in cisplatin treatment ovarian carcinoma. The mechanism underlying autophagy contributed to cisplatin resistance was also studied. Yin et al. showed that phosphatase 2A catalytic



subunit (PP2Ac), which was a target for cisplatin, suppressed the accumulation of LC3-II and restored p62, knocking down of PP2A promoted autophagy in cisplatin-resistant ovarian cancer cells, suggesting protective autophagy inhibited by PP2Ac is a part of the mechanism to how certain ovarian cancers are resistant to cisplatin [53]. Furthermore, a novel mechanism was estimated by Wang et al., they showed that cisplatin activated ERK and subsequently promoted ERK induced-autophagy, which counteracted cisplatin-induced cell death. Knockdown of ERK decreased cisplatin-induced autophagy and increased cisplatin-induced cell death [54]. Paclitaxel is also identified as a first-line chemotherapeutic agent against ovarian cancer, whereas the chemotherapy resistant still exists [55]. Zhang et al. revealed autophagy as a promoter in paclitaxel resistant in ovarian cancer. The up-regulation of autophagy which was induced by thioredoxin domain containing 17 (TXNDC17) promoted paclitaxel resistance in ovarian cancer [56].

Inconsistently, Khurana and colleagues identified that p62 levels were elevated in chemoresistant ovarian cancer cell lines compared to chemosensitive ovarian cancer cell lines, which suggested autophagy was down-regulated in chemoresistant ovarian cancer cell lines [33].

### **Tumor suppressor genes with autophagy in ovarian carcinoma**

Aplasia Ras homolog member I (ARHI; DIRAS3) is an imprinted tumor suppressor gene that is responsible for initiating programmed cell death and inhibiting cancer cell growth, and ARHI is down-regulated in 60% of ovarian cancers [57]. Over-expression of ARHI led to an accelerated level of autophagy by suppressing PI3K/AKT and reducing the expression of Bcl-2 in ovarian cancer cells [57]. Consistently, Lu and colleagues suggested that ARHI promoted autophagosome biogenesis and triggers vesicle nucleation by binding to Beclin1, disrupting Beclin1-Bcl-2 interaction and promoting assembly of the Beclin1-PIK3C3-ATG14 initiation complex. Furthermore, ARHI-Beclin1 interactions were strengthened and autophagy facilitated the survival of nutrient-deprived dormant ovarian cancer cells [58]. Recently, they further clearly illustrated that in ovarian cancer cells, ARHI contributed to the induction of autophagy by down-regulating the epidermal growth factor receptor, inhibiting PI3K and Ras/MAPK signaling and activating the FOXo3a-mediated induction of Rab7 [42]. More recently, Lu et al. found ARHI induced autophagy could enhance sensitivity to cisplatin in ovarian cancer cell lines and xenografts [59], which was inconsistent with that up-regulation of autophagy always contributed to cisplatin resistance in human ovarian cancer [49, 50].

p53 is a well known tumor suppressor protein that was intimately correlated with autophagy, recent reports have indicated that autophagy can be regulated by p53 either for a protective or destructive effect which

depending on the subcellular localization. Nuclear p53 facilitated autophagy, whereas cytoplasmic p53 mainly inhibited autophagy and low cytosolic levels of p53 could trigger autophagy [15, 60, 61]. It has been highlighted that p53 was mutated in >96% of high-grade serous ovarian carcinomas, mutant p53 contributed to ovarian cancer by promoting tumor differentiation, metastasis, and responsiveness to steroid hormones [62, 63]. Despite a substantial body of evidence indicated the close relationship between p53 and autophagy, researches for their connection in ovarian cancer were limited. Kong and colleagues showed that wild-type p53 sensitized multidrug resistant (MDR) human ovarian carcinoma cell lines to vincristine, cisplatin, pirarubicin and etoposide by inducing apoptosis and decreasing autophagy, while mutant p53 reversed the MDR by triggering autophagic cell death, necrosis and apoptosis [64].

The phosphatase and tensin homolog (PTEN) protein is one of the most commonly mutated tumor suppressor genes with dual specificity phosphatase activity [65]. PTEN is able to initiate autophagy by dephosphorylating PIP3 in the PI3K/AKT/mTOR signaling pathway, loss of PTEN in cancers leads to decreased levels of autophagy and facilitates tumorigenesis [66, 67]. Studies found mutations of PTEN commonly occur in ovarian cancer [63, 68]. Study also suggested that low level of Beclin-1 and PTEN resulted in drug resistance through reducing autophagic activity in the epithelial ovarian cancer tissues [69].

### **miRNAs with autophagy in ovarian carcinoma**

miRNAs are known as one of the most popular epigenetic genes, are a class of small noncoding RNAs of about 22 nucleotides in length. miRNAs inhibit gene expression transcriptionally and post-transcriptionally [70]. It has been well recognized that a vast majority of miRNAs deregulation extensively participated in the progression of cancers by regulating autophagy especially the ATGs proteins [71]. In ovarian cancer, the oncomiR miR-30d was illustrated to impair autophagy by suppressing a multitude of autophagy-related genes including Beclin1, BNIP3L, ATG12, ATG5, ATG2 directly and inhibiting LC3-I conversion to LC3-II [72]. Moreover, transfection of miR-29b which was tumor suppressor could inhibit ATG9A mRNA expression directly in ovarian cancer [41]. In another study by Jiang et al., cisplatin-resistance resulted in miR-152 down-regulation and autophagy up-regulation in ovarian cancer, over-expression of miR-152 sensitized ovarian cancer cells to cisplatin-induced apoptosis by inhibiting ATG14 expression and autophagy-induced cyto-protection [73]. In addition to the above evidence that miRNAs participate in the progression of ovarian cancer by correlating with autophagy, there are a wide range of potential connections between miRNAs and autophagy in ovarian cancer, which need further determined in the future [71].

## Induction of autophagy as a therapeutic option

As we talked above that high level of autophagy contributed to cell apoptosis generally, whereupon, the therapeutic relevance of induction of autophagy as an option for ovarian cancer therapy is widely researched. The following numerous studies conform to this opinion. Dasatinib and dihydroxytychantonol 2 were showed to inhibit ovarian cancer cells (SKOV3 and Hey) growth by inducing the expression of LC3B-II, Beclin1 and Atg12 [74, 75]. In A2780 ovarian cancer cells, C2-ceramide treatment benefited to cells apoptosis was through up-regulation of LC3-II [76]. MORAB-003 (farletuzumab), which is a humanized anti-folate receptor alpha (FR $\alpha$ ) monoclonal antibody derived from optimization of the LK26 molecule, contributed to human ovarian cancer cells (A2780, HeyA8, SKOV3ip1 and IGROV1) death associated with increased expression of LC3-II and enriched autophagic vacuolization in ovarian cancer [74]. Furthermore, cotreatment of suberoylanilide hydroxamic acid (SAHA) and PP242 inhibited growth of ovarian cancer cells (SKOV3 and A2780) synergistically by promoting LC3-II expression and decreasing p62 expression [77]. Likewise, combination treatment of a PARP inhibitor and a selective EGFR inhibitor erlotinib in ovarian cancer A2780 xenografts had an apparently enhanced antitumor effect *via* enhancing autophagy compared to their monotherapy [78]. The result also existed in the combination treatment of saracatinib and fulvestrant in patients with ovarian cancer [79]. Furthermore, study suggested that resveratrol could induce human ovarian cancer cells (OVCAR-3 and Caov-3) apoptosis by triggering ATG5 expression and promoting LC3 cleavage, inhibiting autophagy with chloroquine reduced resveratrol-induced cells death [80]. Radiotherapy has been offered in the palliative setting after first-line chemotherapy failure for ovarian cancer [81]. It was estimated that treatment ovarian cancer with radiation was implicated with the activation of autophagy. A recent *in vivo* study investigated that andrographolide acted as a strong radiosensitizer in human ovarian SKOV3 xenografts by increasing the level of Beclin1 and ATG5 and the conversion from LC3-I to LC3-II [82]. In another ovarian cancer cell, studies convincingly illustrated that ghrelin, emodin and B19, which was a novel monocarbonyl analogue of curcumin, played an antitumor effect of on HO-8910 cells by inducing autophagy, including increased level of MAP LC3, Beclin1, Atg12-Atg5 complex, promotion of transformation of LC3-I to LC3-II and decreased level of p62 [83–85]. In a recent *in vitro* and *in vivo* study in chemoresistant ovarian cancer cell lines, quinacrine was observed to promote autophagosome accumulation and enhance autophagic flux by clearance of p62, knockdown of p62 facilitated quinacrine-activated cell death and chemosensitization [33]. Of special note is that, Mono-Pt, which is a novel monofunctional platinum (II) complex, played an anticancer effect in ovarian cancer *via* increasing the

punctate distribution of LC3 and the ratio of LC3-II to LC3-I, Mono-Pt-induced cell death was significantly restricted by the knockdown of either Beclin1, ATG7 or the autophagy inhibitors 3-methyladenine, chloroquine and bafilomycin A1. The charm of these results was distinct from the cisplatin, which triggered autophagy to act as a protector in ovarian cancer [23]. It was interesting to notice that vaccinia virus induced ovarian cancer cells programmed necrosis by changing the rate of lysosomal degradation of LC3B-II, but did not increase autophagic flux and did not rely on autophagy-induced death [75]. Noteworthily, BH3 mimetic S1 led to autophagy activation that attenuated ER stress-induced apoptosis in SKOV3/DDP cells, inhibition of autophagy increased S1-induced ER stress-stimulated apoptosis at early time points (2 and 4 h). However, the activation of autophagy was attenuated and S1-induced ER stress-stimulated apoptosis acted as a promoter in killing SKOV3/DDP cells in the end [86].

It has been well studied the therapeutic mechanism under which induced autophagy in ovarian cancer treatment. Studies extensively showed that the induction of autophagy was involved in inhibition of AKT/mTOR/ (p70S6K) signaling pathway [35, 38, 65, 74, 76, 78, 79] and activation of MAPK (ERK), JNK, and AMPK signaling pathways [36, 38, 76, 87]. Inhibition of AKT/mTOR/(p70S6K) signaling pathway and activation of MAPK (ERK), JNK and AMPK signaling pathways increased autophagy-induced cell apoptosis in ovarian cancer. Furthermore, drug-induced autophagy induction was also implicated in reduction of Bcl-2, over-expression of Bcl-2 inhibited autophagy-induced apoptosis [75, 88]. Jin et al. demonstrated C2-ceramide-induced autophagy in A2780 ovarian cancer cells was though activating forkhead box O3 (FOXO3) and its target genes [76]. In addition, G129R induced the accumulation of autophagy by blocking the tumoral PRL/PRLR axis in ovarian cancer [28].

## Inhibition of autophagy as a therapeutic option

As we stated above, autophagy can act as a survival promoter in the context of hypoxic, nutrient-deficient environments and chemotherapy. It has been well elucidated that autophagy acted as a protector in the chemotherapy of ovarian cancer. For example, EGFR inhibitor AG1478 and metformin-induced ovarian cancer cells apoptosis resulted in up-regulation of autophagy characterized by elevation of LC3-II, Beclin1, ATG5-ATG12 complex and decreased p62, inhibition of autophagy significantly facilitated the anticancer effect of AG1478 and metformin [89, 90]. Cisplatin-resistant in ovarian cancer was involved in up-regulation of autophagy. Suppression of autophagy in cisplatin-resistant ovarian cancer cells contributed to the therapeutic effect of cisplatin. Studies found that dihydroartemisinin, bortezomib and MTRR silencing inhibited cisplatin-resistant and potentiated the anticancer effect of cisplatin *via* inhibiting autophagy in ovarian cancer cells [43, 81, 82]. In line therewith, Chung et al. identified that ellagic acid was able to assist

the chemotherapy efficacy of doxorubicin by inhibiting autophagy in ovarian carcinoma ES-2 and PA-1 cells [91]. A recent study showed the effectiveness of elaiophylin, a novel autophagy inhibitor, in the treatment of ovarian cancer cells and found that elaiophylin decreased cell viability in combination with cisplatin or under hypoxia conditions [92]. In the ovarian cancer xenograft mouse model, endometrioid SKOV-3 cells were shown to be resistant to 4-(N-(S-penicillaminylacetyl) amino) phenylarsonous acid (PENAO) due to an ability to cope with PENAO-induced oxidative stress. Whereas using mTORC1 inhibitor in combination with PENAO synergistically to inhibit SKOV-3 cells proliferation [93]. Lately, Wang et al. implicated that autophagy could protect ovarian cancer-associated fibroblasts against oxidative stress, blockage of autophagy could sensitize ovarian cancer associated fibroblasts to chemotherapeutic drug cisplatin [94].

The above findings suggested that chemotherapy together with inhibition of autophagy may be the alternative

way to treat ovarian cancer [27, 95, 96]. Furthermore, inhibition of autophagy was explicitly observed to convert the combination of FTY720 with cisplatin from an antagonistic into an additive effect toward killing ovarian cancer cells [97]. Inconsistently, Ali et al. suggested that dorsomorphin successfully resensitized drug-resistant ovarian cancer cells to the killing effects of platinum agents by inducing autophagy [98]. It was worth nothing that simvastatin was postulated to activate and block the autophagy pathway at different points in the treatment for ovarian cancer [99].

## CONCLUSION AND PERSPECTIVES

By absorbing and integrating the previous studies, the most established conclusion is that autophagy plays dual role in ovarian carcinoma (Figure 2). In general, the level of autophagy is down-regulated in ovarian

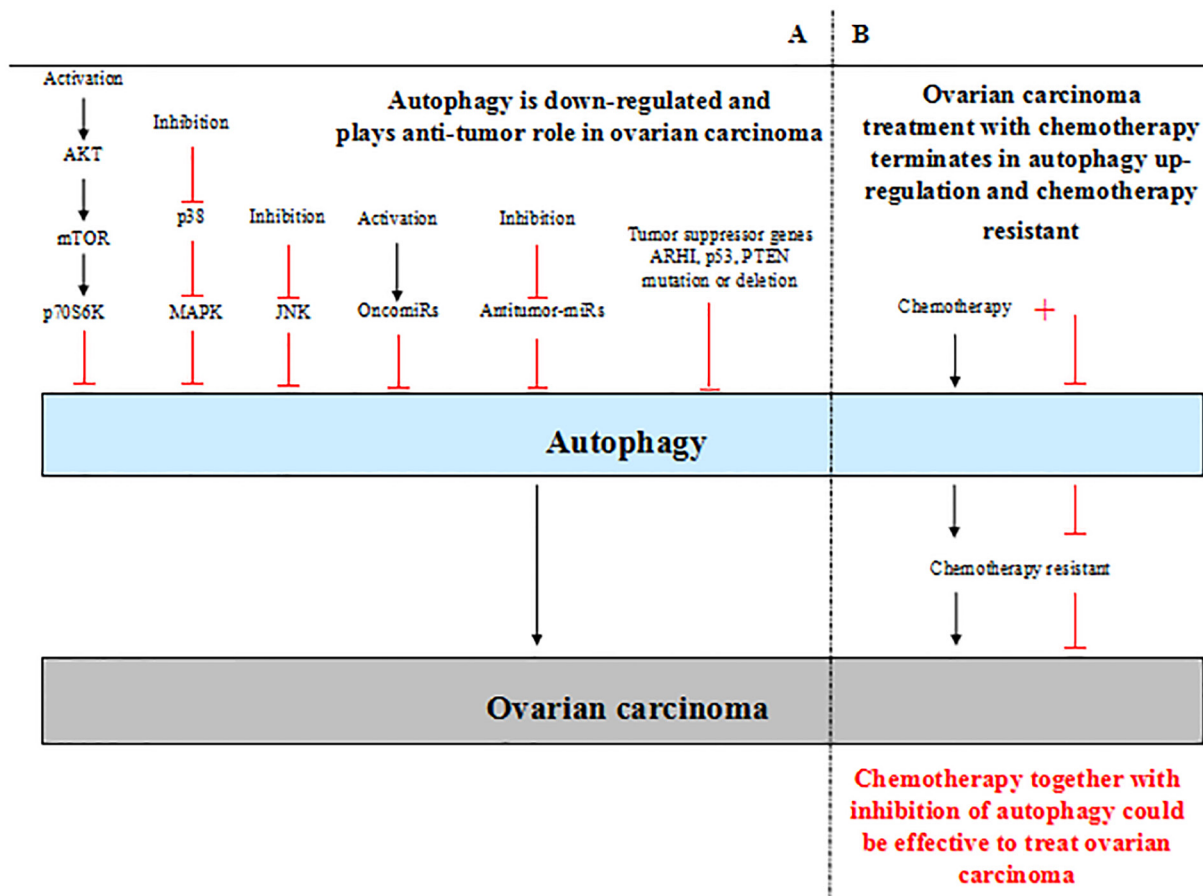

**Figure 2:** A. Autophagy plays dual roles in ovarian carcinoma. The level of autophagy is down-regulated in ovarian carcinoma generally. In such context, autophagy plays an anti-tumor role in ovarian carcinoma; low level of autophagy contributes to ovarian carcinoma development. The activation of AKT/mTOR signaling pathway and inhibition of p38 MAPK and JNK signaling pathways lead to low level of autophagy in ovarian carcinoma. Furthermore, activation of oncomiRs inhibit autophagy directly, inhibition of antitumor-miRs also lead to down-regulation of autophagy. In addition, the tumor suppressor genes mutation or deletion causes inhibition of autophagy in ovarian carcinoma, such as ARHI, p53, PTEN. B. In the context of ovarian carcinoma treatment with chemotherapy, autophagy is up-regulated and terminates in chemotherapy resistant. Chemotherapy together with inhibition of autophagy could inhibit chemotherapy resistant and be effective to treat ovarian carcinoma.

carcinoma. In such context, autophagy acts a protector in ovarian carcinoma, promoting autophagy contributes to inhibition of ovarian carcinoma development. The mechanism underlying autophagy in the progression

of ovarian carcinoma involves in autophagy-related signaling pathways activation or inhibition, autophagy-related tumor suppressor genes mutation or deletion and abnormal miRNAs expression (Table 1). However,

**Table 1: Autophagy-related genes in ovarian carcinom**

| Gene           | Expression  | Function                                                                                                                                                                                                                           | References  |
|----------------|-------------|------------------------------------------------------------------------------------------------------------------------------------------------------------------------------------------------------------------------------------|-------------|
| LC3-II         | Down        | Promoting autophagy-related cell death is required for up-regulation of LC3-II levels in ovarian cancer tissues and cells.                                                                                                         | [25–28]     |
| p62            | Up          | High expression of cytoplasmic p62 in ovarian cancer is positive correlated with serous carcinoma, advanced stage, presence of residual tumor and low overall survival rate.                                                       | [32]        |
| Beclin1        | Down        | High levels of Beclin1 are negative associated with advanced FIGO stage, histological grade, and exhibit better survival. Down-regulation of Beclin1 contributes to ovarian carcinoma development is through up-regulating Bcl-xL. | [25, 35–37] |
| ATG5, ATG7     | Down        | Down-regulation of ATG5 and ATG7 block autophagy induction in ovarian cancer cell lines.                                                                                                                                           | [39]        |
| ATG9A          | Up          | Elevated ATG9A is negative related with overall survival and progression-free survival in ovarian cancer.                                                                                                                          | [41]        |
| PI3K/Akt/mTOR  | Activation  | Activation of PI3K/Akt/mTOR signaling pathway promotes ovarian cancer development by inhibiting autophagy.                                                                                                                         | [3, 42, 43] |
| Ras/MAP        | Activation  | Activation of Ras/MAP signaling pathway promotes ovarian cancer development by inhibiting autophagy.                                                                                                                               | [42]        |
| p38 MAPK/JNK   | Suppression | Suppression of p38 MAPK/JNK signaling pathway contributes to ovarian cancer development by inhibiting autophagy.                                                                                                                   | [45–47]     |
| ARHI ( DIRAS3) | Down        | Down-regulated ARHI accelerates the development of ovarian cancer by restraining autophagy.                                                                                                                                        | [57]        |
| p53            | Down        | Wild-type p53 sensitizes multidrug resistant human ovarian carcinoma cell lines to chemotherapy by decreasing autophagy, mutant p53 reverses the multidrug resistant by triggering autophagic cell death, necrosis and apoptosis.  | [64]        |
| PTEN           | Down        | Low level of PTEN resulted in drug resistance through reducing autophagic activity in the epithelial ovarian cancer tissues.                                                                                                       | [69]        |
| miR-30d        | Up          | Up-regulation of miR-30d contributes to ovarian cancer development by suppressing Beclin1, BNIP3L, ATG12, ATG5, ATG2 directly and inhibiting LC3-I conversion to LC3-II.                                                           | [72]        |

(Continued)



| Gene    | Expression | Function                                                                                                                                                        | References |
|---------|------------|-----------------------------------------------------------------------------------------------------------------------------------------------------------------|------------|
| miR-29b | Down       | Transfection of miR-29b inhibits ovarian cancer development by suppressing ATG9A mRNA expression directly.                                                      | [41]       |
| miR-152 | Down       | Over-expression of miR-152 sensitizes ovarian cancer cells to cisplatin-induced apoptosis by inhibiting ATG14 expression and autophagy-induced cyto-protection. | [73]       |

in the context of ovarian carcinoma treatment with chemotherapy, autophagy is up-regulated and tends to restrict the function of chemotherapy, which terminates in chemotherapy resistant. So when the treatment is replaced by chemotherapy together with inhibition of autophagy, which will be more effective. Nevertheless, the perspective is controversial; and the complicated behavior of autophagy in ovarian carcinoma makes it frustrated to treat ovarian carcinoma by promoting or inhibiting autophagy simply. Moreover, the precise mechanism of autophagy in ovarian carcinoma also remains to be determined.

Although numerous of evidence indicates autophagy modulation could be a potential therapeutic method for ovarian carcinoma, the clinical application is limited. Hopefully, as researches continued, we may finally have the opportunity to discover the clear picture of autophagy in ovarian carcinoma and identify potential therapeutic strategy approach for ovarian carcinoma by regulating autophagy in clinical.

## ACKNOWLEDGMENTS

The work was supported by the National Science Foundation of China (Nos. 81273526, 81473268).

## CONFLICTS OF INTEREST

None.

## REFERENCES

- Siegel RL, Miller KD and Jemal A. Cancer statistics, 2016. *CA Cancer J Clin.* 2016; 66:7-30.
- Nasioudis D, Sisti G, Kanninen TT, Holcomb K, Di Tommaso M, Fambrini M and Witkin SS. Epidemiology and outcomes of squamous ovarian carcinoma; a population-based study. *Gynecol Oncol.* 2016; 141:128-133.
- Bai H, Li H, Li W, Gui T, Yang J, Cao D and Shen K. The PI3K/AKT/mTOR pathway is a potential predictor of distinct invasive and migratory capacities in human ovarian cancer cell lines. *Oncotarget.* 2015; 6:25520-25532. doi: 10.18632/oncotarget.4550.
- Piha-Paul SA, Wheler JJ, Fu S, Levenback C, Lu K, Falchook GS, Naing A, Hong DS, Tsimberidou AM and Kurzrock R. Advanced gynecologic malignancies treated with a combination of the VEGF inhibitor bevacizumab and the mTOR inhibitor temsirolimus. *Oncotarget.* 2014; 5:1846-1855. doi: 10.18632/oncotarget.1834.
- Wheler JJ, Moulder SL, Naing A, Janku F, Piha-Paul SA, Falchook GS, Zinner R, Tsimberidou AM, Fu S, Hong DS, Atkins JT, Yelensky R, Stephens PJ and Kurzrock R. Anastrozole and everolimus in advanced gynecologic and breast malignancies: activity and molecular alterations in the PI3K/AKT/mTOR pathway. *Oncotarget.* 2014; 5:3029-3038. doi: 10.18632/oncotarget.1799.
- Orfanelli T, Jeong JM, Doulaveris G, Holcomb K and Witkin SS. Involvement of autophagy in cervical, endometrial and ovarian cancer. *Int J Cancer.* 2014; 135:519-528.
- Mizushima N, Levine B, Cuervo AM and Klionsky DJ. Autophagy fights disease through cellular self-digestion. *Nature.* 2008; 451:1069-1075.
- Zhang H, Chang JT, Guo B, Hansen M, Jia K, Kovacs AL, Kumsta C, Lapierre LR, Legouis R, Lin L, Lu Q, Melendez A, O'Rourke EJ, et al. Guidelines for monitoring autophagy in *Caenorhabditis elegans*. *Autophagy.* 2015; 11:9-27.
- Lavandero S, Chiong M, Rothermel BA and Hill JA. Autophagy in cardiovascular biology. *J Clin Invest.* 2015; 125:55-64.
- Yla-Anttila P, Vihinen H, Jokitalo E and Eskelinen EL. 3D tomography reveals connections between the phagophore and endoplasmic reticulum. *Autophagy.* 2009; 5:1180-1185.
- Ding Z, Liu S, Wang X, Dai Y, Khaidakov M, Romeo F and Mehta JL. LOX-1, oxidant stress, mtDNA damage, autophagy, and immune response in atherosclerosis. *Can J Physiol Pharmacol.* 2014; 92:524-530.
- Fan J, Kou X, Jia S, Yang X, Yang Y and Chen N. Autophagy as a Potential Target for Sarcopenia. *J Cell Physiol.* 2016; 231:1450-1459.
- Lee YJ and Jang BK. The Role of Autophagy in Hepatocellular Carcinoma. *Int J Mol Sci.* 2015; 16:26629-26643.
- Noda NN and Inagaki F. Mechanisms of Autophagy. *Annu Rev Biophys.* 2015; 44:101-122.



15. Tang J, Di J, Cao H, Bai J and Zheng J. p53-mediated autophagic regulation: A prospective strategy for cancer therapy. *Cancer Lett.* 2015; 363:101-107.
16. Deretic V, Kimura T, Timmins G, Moseley P, Chauhan S and Mandell M. Immunologic manifestations of autophagy. *J Clin Invest.* 2015; 125:75-84.
17. Levine B and Kroemer G. Autophagy in the pathogenesis of disease. *Cell.* 2008; 132:27-42.
18. Mathew R, Karp CM, Beaudoin B, Vuong N, Chen G, Chen HY, Bray K, Reddy A, Bhanot G, Gelinac C, Dipaola RS, Karantza-Wadsworth V and White E. Autophagy suppresses tumorigenesis through elimination of p62. *Cell.* 2009; 137:1062-1075.
19. Chen HY and White E. Role of autophagy in cancer prevention. *Cancer Prev Res (Phila).* 2011; 4:973-983.
20. Degenhardt K, Mathew R, Beaudoin B, Bray K, Anderson D, Chen G, Mukherjee C, Shi Y, Gelinac C, Fan Y, Nelson DA, Jin S and White E. Autophagy promotes tumor cell survival and restricts necrosis, inflammation, and tumorigenesis. *Cancer Cell.* 2006; 10:51-64.
21. White E. Deconvoluting the context-dependent role for autophagy in cancer. *Nat Rev Cancer.* 2012; 12:401-410.
22. Kao C, Chao A, Tsai CL, Chuang WC, Huang WP, Chen GC, Lin CY, Wang TH, Wang HS and Lai CH. Bortezomib enhances cancer cell death by blocking the autophagic flux through stimulating ERK phosphorylation. *Cell Death Dis.* 2014; 5:e1510.
23. Guo WJ, Zhang YM, Zhang L, Huang B, Tao FF, Chen W, Guo ZJ, Xu Q and Sun Y. Novel monofunctional platinum (II) complex Mono-Pt induces apoptosis-independent autophagic cell death in human ovarian carcinoma cells, distinct from cisplatin. *Autophagy.* 2013; 9:996-1008.
24. Ogata M, Hino S, Saito A, Morikawa K, Kondo S, Kanemoto S, Murakami T, Taniguchi M, Tanii I, Yoshinaga K, Shiosaka S, Hammarback JA, Urano F and Imaizumi K. Autophagy is activated for cell survival after endoplasmic reticulum stress. *Mol Cell Biol.* 2006; 26:9220-9231.
25. Shen Y, Li DD, Wang LL, Deng R and Zhu XF. Decreased expression of autophagy-related proteins in malignant epithelial ovarian cancer. *Autophagy.* 2008; 4:1067-1068.
26. Whilding LM, Archibald KM, Kulbe H, Balkwill FR, Oberg D and McNeish IA. Vaccinia virus induces programmed necrosis in ovarian cancer cells. *Mol Ther.* 2013; 21:2074-2086.
27. Shuvayeva G, Bobak Y, Igumentseva N, Titone R, Morani F, Stasyk O and Isidoro C. Single amino acid arginine deprivation triggers prosurvival autophagic response in ovarian carcinoma SKOV3. *Biomed Res Int.* 2014; 2014:505041.
28. Wen Y, Zand B, Ozpolat B, Szczepanski MJ, Lu C, Yuca E, Carroll AR, Alpay N, Bartholomeusz C, Tekedereli I, Kang Y, Rupaimoole R, Pecot CV, et al. Antagonism of tumoral prolactin receptor promotes autophagy-related cell death. *Cell Rep.* 2014; 7:488-500.
29. Zhan L, Yang Y, Ma TT, Huang C, Meng XM, Zhang L and Li J. Transient receptor potential vanilloid 4 inhibits rat HSC-T6 apoptosis through induction of autophagy. *Mol Cell Biochem.* 2015; 402:9-22.
30. Bjorkoy G, Lamark T, Brech A, Outzen H, Perander M, Overvatn A, Stenmark H and Johansen T. p62/SQSTM1 forms protein aggregates degraded by autophagy and has a protective effect on huntingtin-induced cell death. *J Cell Biol.* 2005; 171:603-614.
31. Pankiv S, Clausen TH, Lamark T, Brech A, Bruun JA, Outzen H, Overvatn A, Bjorkoy G and Johansen T. p62/SQSTM1 binds directly to Atg8/LC3 to facilitate degradation of ubiquitinated protein aggregates by autophagy. *J Biol Chem.* 2007; 282:24131-24145.
32. Iwadata R, Inoue J, Tsuda H, Takano M, Furuya K, Hirasawa A, Aoki D and Inazawa J. High Expression of SQSTM1/p62 Protein Is Associated with Poor Prognosis in Epithelial Ovarian Cancer. *Acta Histochem Cytochem.* 2014; 47:295-301.
33. Khurana A, Roy D, Kalogera E, Mondal S, Wen X, He X, Dowdy S and Shridhar V. Quinacrine promotes autophagic cell death and chemosensitivity in ovarian cancer and attenuates tumor growth. *Oncotarget.* 2015; 6:36354-36369. doi: 10.18632/oncotarget.5632.
34. Aita VM, Liang XH, Murty VV, Pincus DL, Yu W, Cayanis E, Kalachikov S, Gilliam TC and Levine B. Cloning and genomic organization of beclin 1, a candidate tumor suppressor gene on chromosome 17q21. *Genomics.* 1999; 59:59-65.
35. Cai M, Hu Z, Liu J, Gao J, Liu C, Liu D, Tan M, Zhang D and Lin B. Beclin 1 expression in ovarian tissues and its effects on ovarian cancer prognosis. *Int J Mol Sci.* 2014; 15:5292-5303.
36. Zou J, Yue F, Li W, Song K, Jiang X, Yi J and Liu L. Autophagy inhibitor LRPPRC suppresses mitophagy through interaction with mitophagy initiator Parkin. *PLoS One.* 2014; 9:e94903.
37. Lin HX, Qiu HJ, Zeng F, Rao HL, Yang GF, Kung HF, Zhu XF, Zeng YX, Cai MY and Xie D. Decreased expression of Beclin 1 correlates closely with Bcl-xL expression and poor prognosis of ovarian carcinoma. *PLoS One.* 2013; 8:e60516.
38. Liu C, Yan X, Wang HQ, Gao YY, Liu J, Hu Z, Liu D, Gao J and Lin B. Autophagy-independent enhancing effects of Beclin 1 on cytotoxicity of ovarian cancer cells mediated by proteasome inhibitors. *BMC Cancer.* 2012; 12:622.
39. Correa RJ, Valdes YR, Shepherd TG and DiMattia GE. Beclin-1 expression is retained in high-grade serous ovarian cancer yet is not essential for autophagy induction in vitro. *J Ovarian Res.* 2015; 8:52.
40. Li X, Su J, Xia M, Li H, Xu Y, Ma C, Ma L, Kang J, Yu H, Zhang Z and Sun L. Caspase-mediated cleavage of Beclin1 inhibits autophagy and promotes apoptosis induced by S1

- in human ovarian cancer SKOV3 cells. *Apoptosis*. 2016; 21:225-238.
41. Dai F, Zhang Y and Chen Y. Involvement of miR-29b signaling in the sensitivity to chemotherapy in patients with ovarian carcinoma. *Hum Pathol*. 2014; 45:1285-1293.
  42. Lu Z, Yang H, Sutton MN, Yang M, Clarke CH, Liao WS and Bast RC, Jr. ARHI (DIRAS3) induces autophagy in ovarian cancer cells by downregulating the epidermal growth factor receptor, inhibiting PI3K and Ras/MAP signaling and activating the FOXo3a-mediated induction of Rab7. *Cell Death Differ*. 2014; 21:1275-1289.
  43. Zi D, Zhou ZW, Yang YJ, Huang L, Zhou ZL, He SM, He ZX and Zhou SF. Danusertib Induces Apoptosis, Cell Cycle Arrest, and Autophagy but Inhibits Epithelial to Mesenchymal Transition Involving PI3K/Akt/mTOR Signaling Pathway in Human Ovarian Cancer Cells. *Int J Mol Sci*. 2015; 16:27228-27251.
  44. Bahrami F, Pourgholami MH, Mekkawy AH, Rufener L and Morris DL. Monepantel induces autophagy in human ovarian cancer cells through disruption of the mTOR/p70S6K signalling pathway. *Am J Cancer Res*. 2014; 4:558-571.
  45. Yang X, Xiang X, Xia M, Su J, Wu Y, Shen L, Xu Y and Sun L. Inhibition of JNK3 promotes apoptosis induced by BH3 mimetic S1 in chemoresistant human ovarian cancer cells. *Anat Rec (Hoboken)*. 2015; 298:386-395.
  46. Cho YJ, Woo JH, Lee JS, Jang DS, Lee KT and Choi JH. Eclalbasaponin II induces autophagic and apoptotic cell death in human ovarian cancer cells. *J Pharmacol Sci*. 2016.
  47. Xu L, Zhang X, Li Y, Lu S, Li J, Wang Y, Tian X, Wei JJ, Shao C and Liu Z. Neferine induces autophagy of human ovarian cancer cells via p38 MAPK/ JNK activation. *Tumour Biol*. 2016; 37:8721-8729.
  48. Ai Z, Lu Y, Qiu S and Fan Z. Overcoming cisplatin resistance of ovarian cancer cells by targeting HIF-1-regulated cancer metabolism. *Cancer Lett*. 2016; 373:36-44.
  49. Bao L, Jaramillo MC, Zhang Z, Zheng Y, Yao M, Zhang DD and Yi X. Induction of autophagy contributes to cisplatin resistance in human ovarian cancer cells. *Mol Med Rep*. 2015; 11:91-98.
  50. Sun Y, Liu JH, Jin L, Sui YX, Han LL and Huang Y. Effect of autophagy-related beclin1 on sensitivity of cisplatin-resistant ovarian cancer cells to chemotherapeutic agents. *Asian Pac J Cancer Prev*. 2015; 16:2785-2791.
  51. Chen J, Wang Q, Yin FQ, Zhang W, Yan LH and Li L. MTRR silencing inhibits growth and cisplatin resistance of ovarian carcinoma via inducing apoptosis and reducing autophagy. *Am J Transl Res*. 2015; 7:1510-1527.
  52. Xiao L, Shi XY, Zhang Y, Zhu Y, Zhu L, Tian W, Zhu BK and Wei ZL. YAP induces cisplatin resistance through activation of autophagy in human ovarian carcinoma cells. *Onco Targets Ther*. 2016; 9:1105-1114.
  53. Yin X, Zhang N and Di W. Regulation of LC3-dependent protective autophagy in ovarian cancer cells by protein phosphatase 2A. *Int J Gynecol Cancer*. 2013; 23:630-641.
  54. Wang J and Wu GS. Role of autophagy in cisplatin resistance in ovarian cancer cells. *J Biol Chem*. 2014; 289:17163-17173.
  55. Morgan RJ, Jr., Alvarez RD, Armstrong DK, Burger RA, Castells M, Chen LM, Copeland L, Crispens MA, Gershenson D, Gray H, Hakam A, Havrilesky LJ, Johnston C, et al. Ovarian cancer, version 3.2012. *J Natl Compr Canc Netw*. 2012; 10:1339-1349.
  56. Zhang SF, Wang XY, Fu ZQ, Peng QH, Zhang JY, Ye F, Fu YF, Zhou CY, Lu WG, Cheng XD and Xie X. TXNDC17 promotes paclitaxel resistance via inducing autophagy in ovarian cancer. *Autophagy*. 2015; 11:225-238.
  57. Li J, Cui G, Sun L, Wang SJ, Tian S, Guan Z, Fan WS, Yan ZF, Yang YZ, You YQ, Fu XY, Li LA, Huang K, Li YL and Meng YG. ARHI overexpression induces epithelial ovarian cancer cell apoptosis and excessive autophagy. *Int J Gynecol Cancer*. 2014; 24:437-443.
  58. Lu Z, Baquero MT, Yang H, Yang M, Reger AS, Kim C, Levine DA, Clarke CH, Liao WS and Bast RC, Jr. DIRAS3 regulates the autophagosome initiation complex in dormant ovarian cancer cells. *Autophagy*. 2014; 10:1071-1092.
  59. Washington MN, Suh G, Orozco AF, Sutton MN, Yang H, Wang Y, Mao W, Millward S, Ornelas A, Atkinson N, Liao W, Bast RC, Jr. and Lu Z. ARHI (DIRAS3)-mediated autophagy-associated cell death enhances chemosensitivity to cisplatin in ovarian cancer cell lines and xenografts. *Cell Death Dis*. 2015; 6:e1836.
  60. Levine B and Abrams J. p53: The Janus of autophagy? *Nat Cell Biol*. 2008; 10:637-639.
  61. Tasdemir E, Maiuri MC, Galluzzi L, Vitale I, Djavaheri-Mergny M, D'Amelio M, Criollo A, Morselli E, Zhu C, Harper F, Nannmark U, Samara C, Pinton P, et al. Regulation of autophagy by cytoplasmic p53. *Nat Cell Biol*. 2008; 10:676-687.
  62. Soragni A, Janzen DM, Johnson LM, Lindgren AG, Thai-Quynh Nguyen A, Tiourin E, Soriaga AB, Lu J, Jiang L, Faulk KF, Pellegrini M, Memarzadeh S and Eisenberg DS. A Designed Inhibitor of p53 Aggregation Rescues p53 Tumor Suppression in Ovarian Carcinomas. *Cancer Cell*. 2016; 29:90-103.
  63. Ren YA, Mullany LK, Liu Z, Herron AJ, Wong KK and Richards JS. Mutant p53 promotes epithelial ovarian cancer by regulating tumor differentiation, metastasis, and responsiveness to steroid hormones. *Cancer Res*. 2016.
  64. Kong D, Ma S, Liang B, Yi H, Zhao Y, Xin R, Cui L, Jia L and Liu X. The different regulatory effects of p53 status on multidrug resistance are determined by autophagy in ovarian cancer cells. *Biomed Pharmacother*. 2012; 66:271-278.
  65. Wang X, Huang H and Young KH. The PTEN tumor suppressor gene and its role in lymphoma pathogenesis. *Aging (Albany NY)*. 2015; 7:1032-1049. doi: 10.18632/aging.100855.
  66. Arico S, Petiot A, Bauvy C, Dubbelhuis PF, Meijer AJ, Codogno P and Ogier-Denis E. The tumor suppressor PTEN positively regulates macroautophagy by inhibiting

- the phosphatidylinositol 3-kinase/protein kinase B pathway. *J Biol Chem.* 2001; 276:35243-35246.
67. Avalos Y, Canales J, Bravo-Sagua R, Criollo A, Lavandero S and Quest AF. Tumor suppression and promotion by autophagy. *Biomed Res Int.* 2014; 2014:603980.
  68. Zhang L, Ma T, Brozick J, Babalola K, Budiu R, Tseng G and Vlad AM. Effects of Kras activation and Pten deletion alone or in combination on MUC1 biology and epithelial-to-mesenchymal transition in ovarian cancer. *Oncogene.* 2016.
  69. Ying H, Qu D, Liu C, Ying T, Lv J, Jin S and Xu H. Chemoresistance is associated with Beclin-1 and PTEN expression in epithelial ovarian cancers. *Oncol Lett.* 2015; 9:1759-1763.
  70. Chen K and Rajewsky N. The evolution of gene regulation by transcription factors and microRNAs. *Nat Rev Genet.* 2007; 8:93-103.
  71. Titone R, Morani F, Follo C, Vidoni C, Mezzanzanica D and Isidoro C. Epigenetic control of autophagy by microRNAs in ovarian cancer. *Biomed Res Int.* 2014; 2014:343542.
  72. Yang X, Zhong X, Tanyi JL, Shen J, Xu C, Gao P, Zheng TM, DeMichele A and Zhang L. mir-30d Regulates multiple genes in the autophagy pathway and impairs autophagy process in human cancer cells. *Biochem Biophys Res Commun.* 2013; 431:617-622.
  73. He J, Yu JJ, Xu Q, Wang L, Zheng JZ, Liu LZ and Jiang BH. Downregulation of ATG14 by EGR1-MIR152 sensitizes ovarian cancer cells to cisplatin-induced apoptosis by inhibiting cyto-protective autophagy. *Autophagy.* 2015; 11:373-384.
  74. Wen Y, Graybill WS, Previs RA, Hu W, Ivan C, Mangala LS, Zand B, Nick AM, Jennings NB, Dalton HJ, Sehgal V, Ram P, Lee JS, Vivas-Mejia PE, Coleman RL and Sood AK. Immunotherapy targeting folate receptor induces cell death associated with autophagy in ovarian cancer. *Clin Cancer Res.* 2015; 21:448-459.
  75. Pang Y, Si M, Sun B, Niu L, Xu X, Lu T, Yuan H and Lou H. DHA2, a synthesized derivative of bisbibenzyl, exerts antitumor activity against ovarian cancer through inhibition of XIAP and Akt/mTOR pathway. *Food Chem Toxicol.* 2014; 69:163-174.
  76. Jin Z, Zheng L, Xin X, Li Y, Hua T, Wu T and Wang H. Upregulation of forkhead box O3 transcription is involved in C2-ceramide induced apoptosis and autophagy in ovarian cancer cells in vitro. *Mol Med Rep.* 2014; 10:3099-3105.
  77. Qin Y, Zhao X and Fang Y. PP242 synergizes with suberoylanilide hydroxamic acid to inhibit growth of ovarian cancer cells. *Int J Gynecol Cancer.* 2014; 24:1373-1380.
  78. Sui H, Shi C, Yan Z and Li H. Combination of erlotinib and a PARP inhibitor inhibits growth of A2780 tumor xenografts due to increased autophagy. *Drug Des Devel Ther.* 2015; 9:3183-3190.
  79. Li L, Li X, Han X, Yang T, Fu J, Zhang Y and Gou W. An ovarian cancer model with positive ER: Reversion of ER antagonist resistance by Src blockade. *Oncol Rep.* 2014; 32:943-950.
  80. Lang F, Qin Z, Li F, Zhang H, Fang Z and Hao E. Apoptotic Cell Death Induced by Resveratrol Is Partially Mediated by the Autophagy Pathway in Human Ovarian Cancer Cells. *PLoS One.* 2015; 10:e0129196.
  81. Chundury A, Apicelli A, DeWees T, Powell M, Mutch D, Thaker P, Robinson C, Grigsby PW and Schwarz JK. Intensity modulated radiation therapy for recurrent ovarian cancer refractory to chemotherapy. *Gynecol Oncol.* 2016; 141:134-139.
  82. Zhang C and Qiu X. Andrographolide radiosensitizes human ovarian cancer SKOV3 xenografts due to an enhanced apoptosis and autophagy. *Tumour Biol.* 2015; 36:8359-8365.
  83. Wang Y, Yu H, Zhang J, Ge X, Gao J, Zhang Y and Lou G. Anti-tumor effect of emodin on gynecological cancer cells. *Cell Oncol (Dordr).* 2015; 38:353-363.
  84. Xu Y, Pang X, Dong M, Wen F and Zhang Y. Ghrelin inhibits ovarian epithelial carcinoma cell proliferation in vitro. *Oncol Rep.* 2013; 30:2063-2070.
  85. Qu W, Xiao J, Zhang H, Chen Q, Wang Z, Shi H, Gong L, Chen J, Liu Y, Cao R and Lv J. B19, a novel monocarbonyl analogue of curcumin, induces human ovarian cancer cell apoptosis via activation of endoplasmic reticulum stress and the autophagy signaling pathway. *Int J Biol Sci.* 2013; 9:766-777.
  86. Liu N, Xu Y, Sun JT, Su J, Xiang XY, Yi HW, Zhang ZC and Sun LK. The BH3 mimetic S1 induces endoplasmic reticulum stress-associated apoptosis in cisplatin-resistant human ovarian cancer cells although it activates autophagy. *Oncol Rep.* 2013; 30:2677-2684.
  87. Kandala PK and Srivastava SK. Regulation of macroautophagy in ovarian cancer cells in vitro and in vivo by controlling glucose regulatory protein 78 and AMPK. *Oncotarget.* 2012; 3:435-449. doi: 10.18632/oncotarget.483.
  88. Le XF, Mao W, Lu Z, Carter BZ and Bast RC, Jr. Dasatinib induces autophagic cell death in human ovarian cancer. *Cancer.* 2010; 116:4980-4990.
  89. Moon HS, Kim B, Gwak H, Suh DH and Song YS. Autophagy and protein kinase RNA-like endoplasmic reticulum kinase (PERK)/eukaryotic initiation factor 2 alpha kinase (eIF2alpha) pathway protect ovarian cancer cells from metformin-induced apoptosis. *Mol Carcinog.* 2016; 55:346-356.
  90. Yang Z, Liu Y, Wei X, Zhou X, Gong C, Zhang T, Jin P, Xu S, Ma D and Gao Q. Co-targeting EGFR and Autophagy Impairs Ovarian Cancer Cell Survival during Detachment from the ECM. *Curr Cancer Drug Targets.* 2015; 15:215-226.
  91. Chung YC, Lu LC, Tsai MH, Chen YJ, Chen YY, Yao SP and Hsu CP. The inhibitory effect of ellagic Acid on cell growth of ovarian carcinoma cells. *Evid Based Complement Alternat Med.* 2013; 2013:306705.
  92. Zhao X, Fang Y, Yang Y, Qin Y, Wu P, Wang T, Lai H, Meng L, Wang D, Zheng Z, Lu X, Zhang H, Gao Q, Zhou J and

- Ma D. Elaiophylin, a novel autophagy inhibitor, exerts antitumor activity as a single agent in ovarian cancer cells. *Autophagy*. 2015; 11:1849-1863.
93. Decollogne S, Joshi S, Chung SA, Luk PP, Yeo RX, Nixdorf S, Fedier A, Heinzlmann-Schwarz V, Hogg PJ and Dilda PJ. Alterations in the mitochondrial responses to PENAO as a mechanism of resistance in ovarian cancer cells. *Gynecol Oncol*. 2015; 138:363-371.
94. Wang Q, Xue L, Zhang X, Bu S, Zhu X and Lai D. Autophagy protects ovarian cancer-associated fibroblasts against oxidative stress. *Cell Cycle*. 2016:0.
95. Correa RJ, Valdes YR, Peart TM, Fazio EN, Bertrand M, McGee J, Prefontaine M, Sugimoto A, DiMattia GE and Shepherd TG. Combination of AKT inhibition with autophagy blockade effectively reduces ascites-derived ovarian cancer cell viability. *Carcinogenesis*. 2014; 35:1951-1961.
96. Delaney JR, Patel C, McCabe KE, Lu D, Davis MA, Tancioni I, von Schalscha T, Bartakova A, Haft C, Schlaepfer DD and Stupack DG. A strategy to combine pathway-targeted low toxicity drugs in ovarian cancer. *Oncotarget*. 2015; 6:31104-31118. doi: 10.18632/oncotarget.5093.
97. Zhang N, Dai L, Qi Y, Di W and Xia P. Combination of FTY720 with cisplatin exhibits antagonistic effects in ovarian cancer cells: role of autophagy. *Int J Oncol*. 2013; 42:2053-2059.
98. Ali JL, Lagasse BJ, Minuk AJ, Love AJ, Moraya AI, Lam L, Arthur G, Gibson SB, Morrison LC, Werbowetski-Ogilvie TE, Fu Y and Nachtigal MW. Differential cellular responses induced by dorsomorphin and LDN-193189 in chemotherapy-sensitive and chemotherapy-resistant human epithelial ovarian cancer cells. *Int J Cancer*. 2015; 136:E455-469.
99. Robinson E, Nandi M, Wilkinson LL, Arrowsmith DM, Curtis AD and Richardson A. Preclinical evaluation of statins as a treatment for ovarian cancer. *Gynecol Oncol*. 2013; 129:417-424.
